# Supplementary material for: Synthesis of high-silica AEI zeolites with enhanced thermal stability by hydrothermal conversion of FAU zeolites, and their activity in the selective catalytic reduction of NOx with NH3
Source: Royal Society of Chemistry journal article supplement (doi:10.1039/c4ta05621c), 2014-11-19
Supplement: c4ta05621c1.pdf [file c4ta05621c1.pdf]

## Supplementary Information

# **Synthesis of high-silica AEI zeolite with enhanced thermal stability by hydrothermal conversion of FAU zeolite, and its activity in the selective catalytic reduction of NO<sub>x</sub> with NH<sub>3</sub>**

Takushi Sonoda,<sup>a</sup> Toshihiro Maruo,<sup>a</sup> Yoshitaka Yamasaki,<sup>a</sup> Nao Tsunoji,<sup>a</sup> Yasuyuki Takamitsu,<sup>b</sup> Masahiro Sadakane,<sup>a</sup> Tsuneji Sano\*<sup>a</sup>

<sup>a</sup>Department of Applied Chemistry, Graduate School of Engineering, Hiroshima University, Higashi-Hiroshima 739-8527, Japan, E-mail: [tsano@hiroshima-u.ac.jp](mailto:tsano@hiroshima-u.ac.jp)

<sup>b</sup>Nanyo Research Laboratory, Tosoh Corporation, Shunan, Yamaguchi 746-8501, Japan

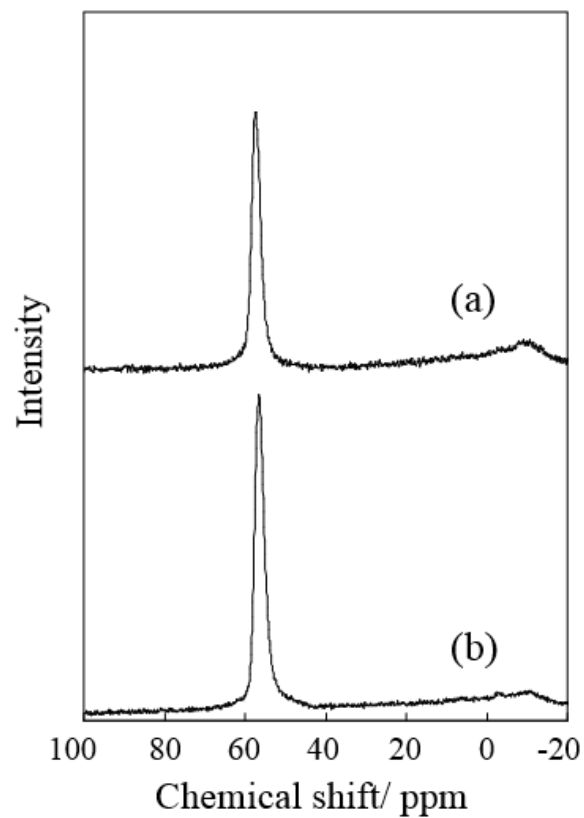

**Figure S1.**  $^{27}\text{Al}$  MAS NMR spectra of AEI zeolites. (a) Sample 20 and (b) Sample 25.

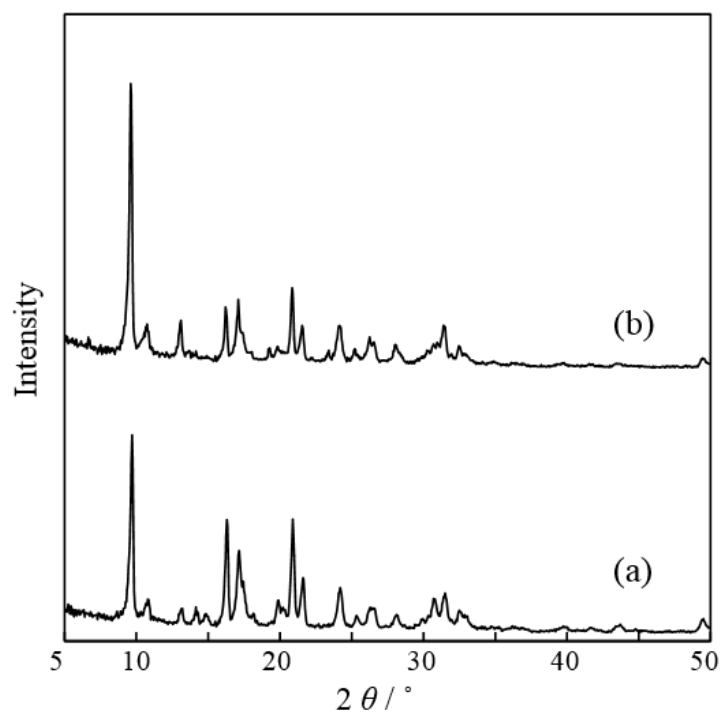

**Figure S2.** XRD spectra of (a) as-synthesized AEI zeolite and (b) AEI zeolite after thermal treatment at 700 °C for 6 h under vacuum, followed by calcination in air at 600 °C for 6 h.

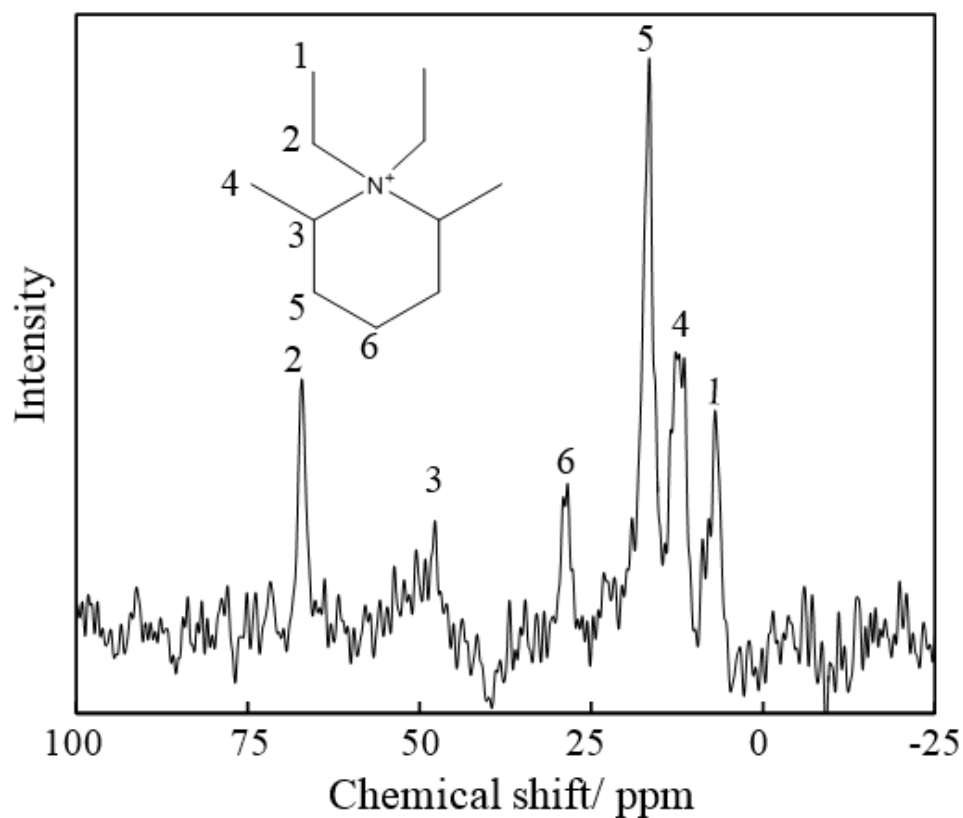

**Figure S3.**  $^{13}\text{C}$  CP/MAS NMR spectrum of AEI zeolite synthesized with the *N,N*-diethyl-2,6-dimethylpiperidinium cation.

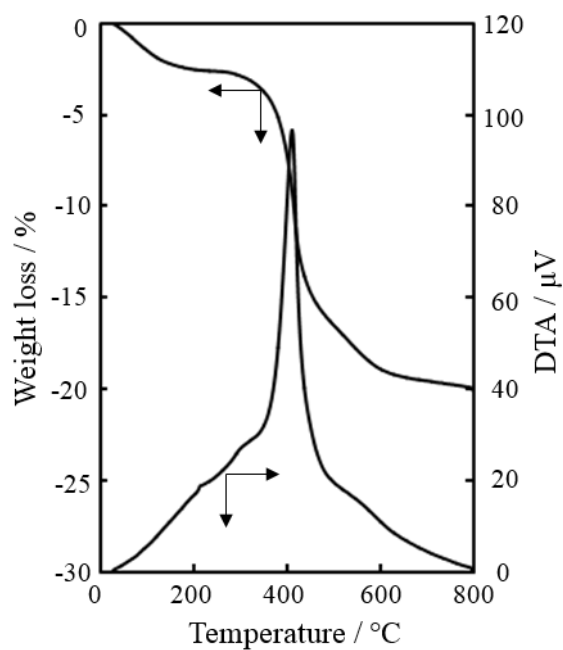

**Figure S4.** TG/DTA curves of AEI zeolite synthesized with the *N,N*-diethyl-2,6-dimethylpiperidinium cation.

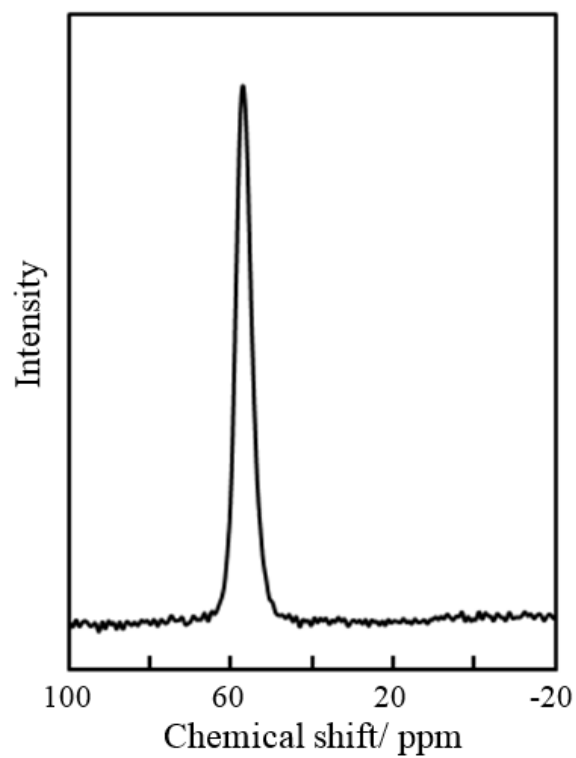

**Figure S5.**  $^{27}\text{Al}$  MAS NMR spectrum of AEI zeolite synthesized with the *N,N*-diethyl-2,6-dimethylpiperidinium cation.

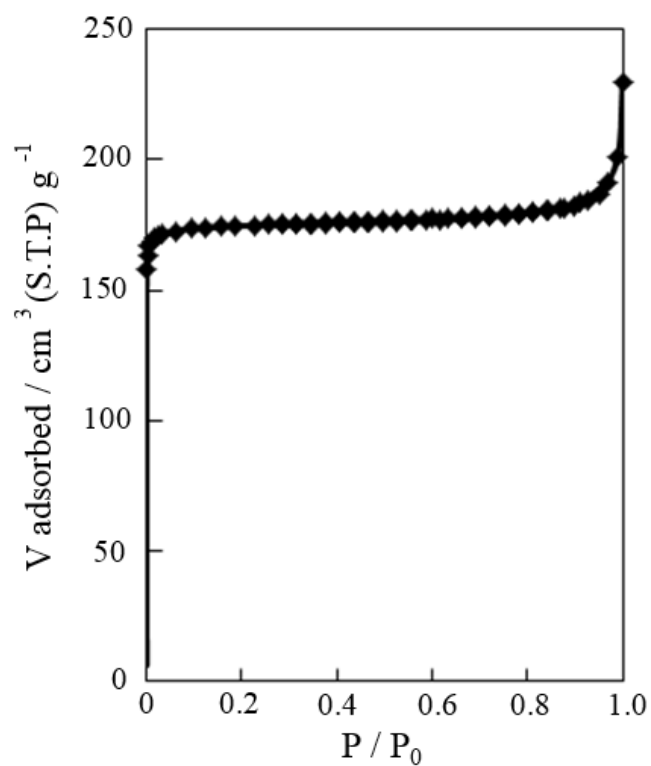

**Figure S6.**  $\text{N}_2$  adsorption isotherm of AEI zeolite synthesized with the *N,N*-diethyl-2,6-dimethylpiperidinium cation.

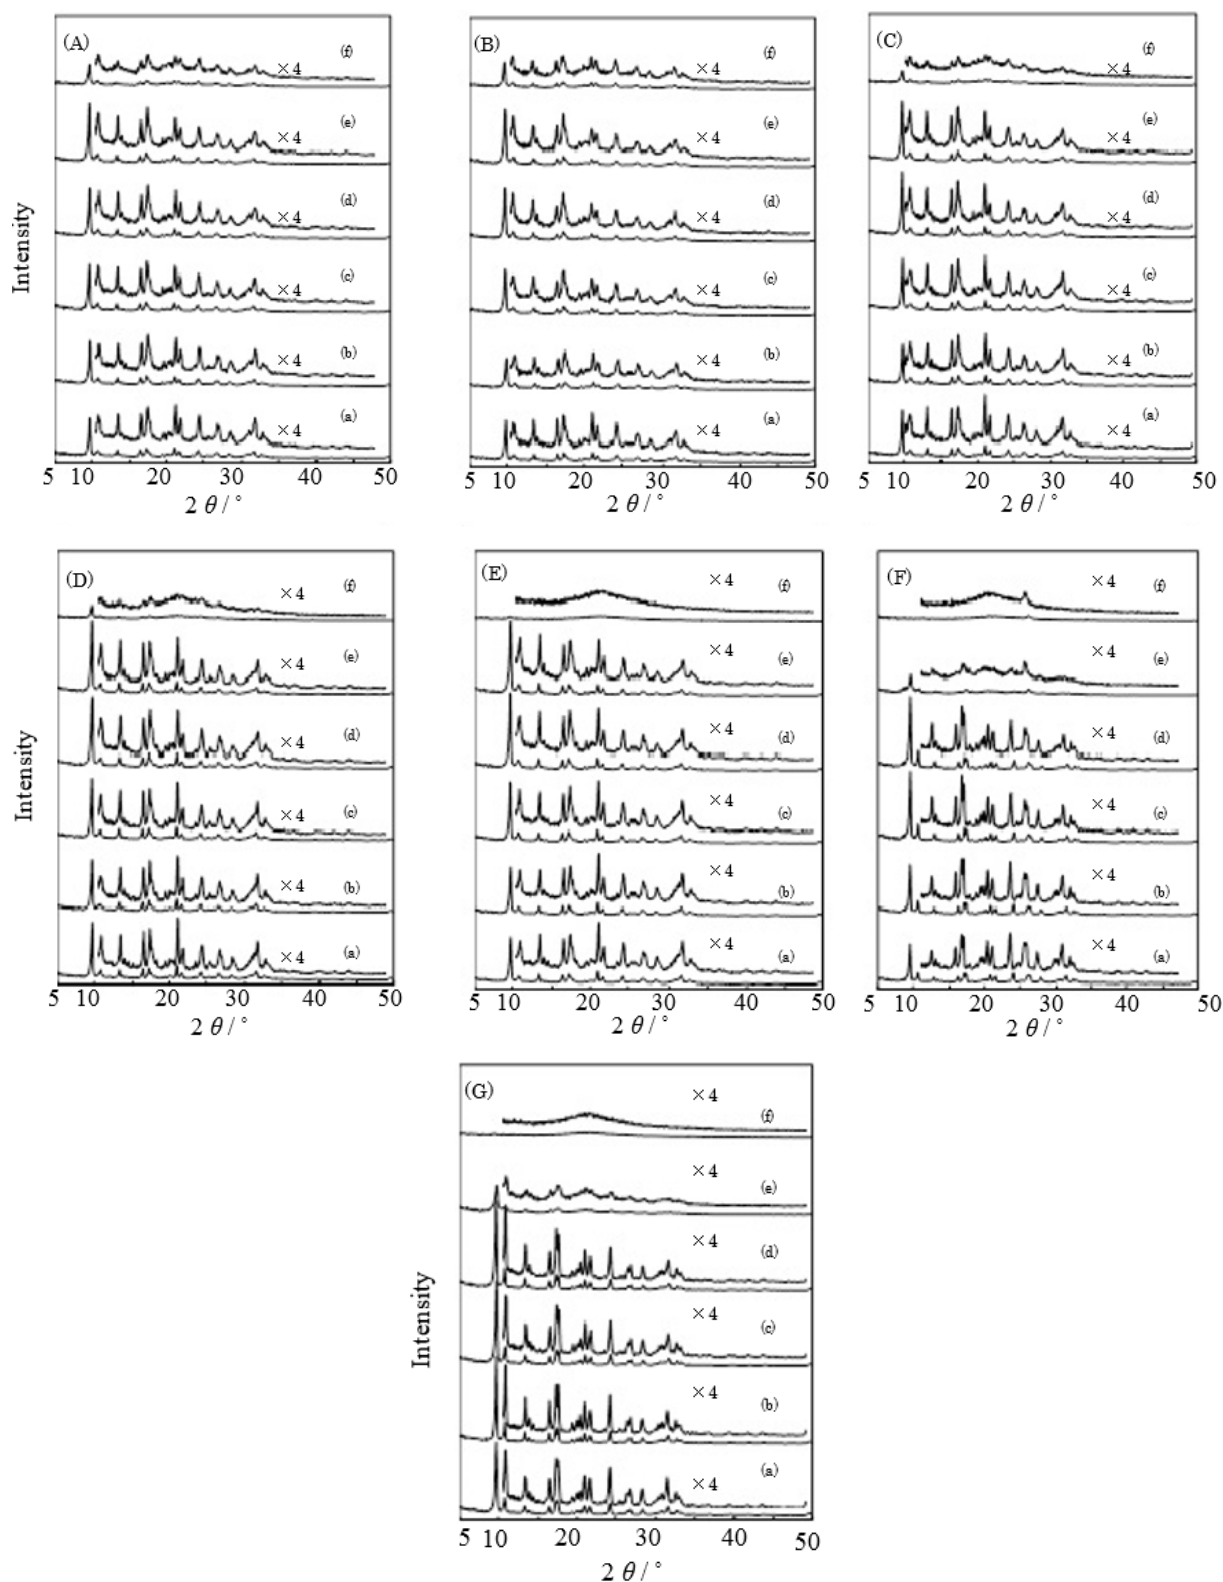

**Figure S7.** XRD spectra of various AEI zeolites after calcination for 1 h at (a) 600 °C, (b) 700 °C, (c) 800 °C, (d) 900 °C, (e) 1000 °C, and (f) 1100 °C. (A) Sample 17 (P/Al = 1.21), (B) Sample 18 (P/Al = 0.65), (C) Sample 23 (P/Al = 0.59), (D) Sample 20 (P/Al = 0.33), (E) Sample 25 (P/Al = 0.25), (F) Sample 28 (P/Al = 0), and (G) P-modified Sample 28 (P/Al = 0.19).

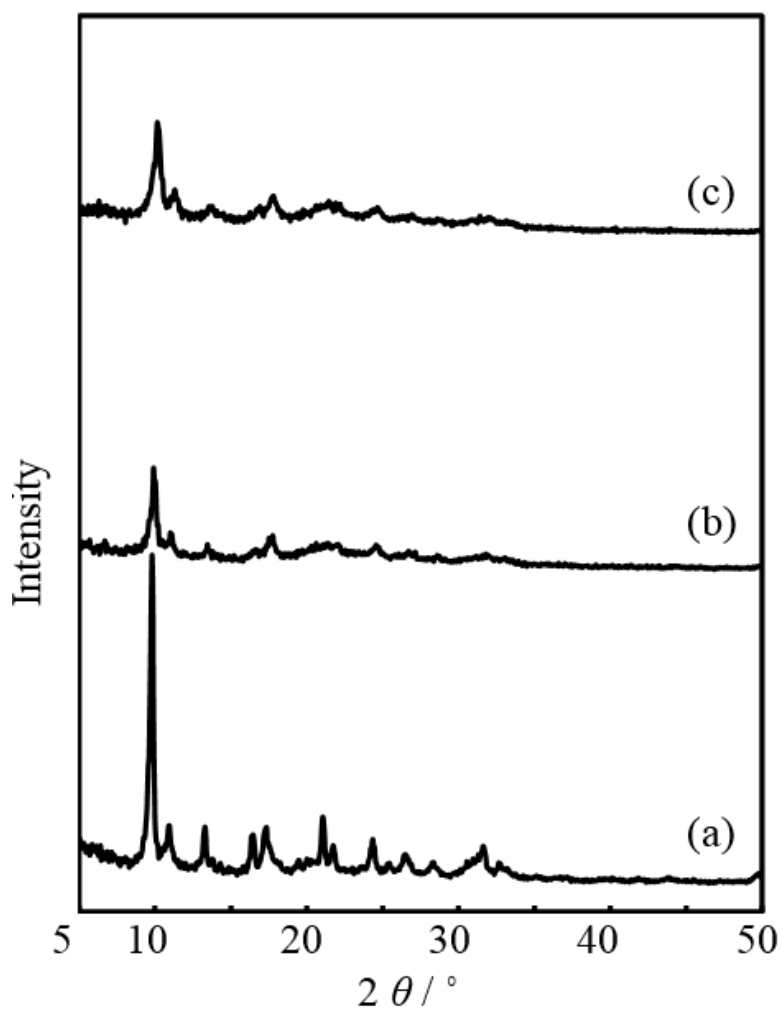

**Figure S8.** XRD spectra of Cu-loaded AEI catalysts (hydrothermally treated at 900 °C for 4 h) after the NH<sub>3</sub>-SCR of NO<sub>x</sub> reaction. (a) Modified with P-containing SDA (Catalyst 4), (b) non-phosphorus-modified (Catalyst 6), and (c) modified by impregnation with (NH<sub>4</sub>)<sub>2</sub>HPO<sub>4</sub> (Catalyst 7).
